# Supplementary material
Source: publisher figshare collection journal article supplement (https://acs.figshare.com/ndownloader/files/3844693)
Supplement: Supplementary file 1 [file 3844693]

## Sheet: DIGESTIF proteolysis in serum
		Technical replicate 1	Technical replicate 2	Technical replicate 3	Mean of 3 technical replicates	Standard deviation	CV (%)
Digestion conditions		Peak area (best transition)	Peak area (best transition)	Peak area (best transition)
LFLQFGAQGSPFLK		LFLQFGAQGSPFLK (y10)	LFLQFGAQGSPFLK (y10)	LFLQFGAQGSPFLK (y10)	LFLQFGAQGSPFLK	LFLQFGAQGSPFLK	LFLQFGAQGSPFLK
Test 1	Trypsin 1/20, 37°C, 5h	32165	25522	27641	28442.7	3393.28	11.9303
Test 2	Trypsin 1/100, 37°C, 5h	34329	12761	11470	19520	12841.2	65.7849
Test 3	Trypsin 1/1000, 37°C, 5h	2888	1648	793	1776.33	1053.38	59.3008
Test 4	Trypsin 1/20, 30°C, 5h	7085	7615	9065	7921.67	1025	12.9392
Test 5	Trypsin 1/20, 23°C, 5h	2498	5092	4066	3885.33	1306.4	33.624
Test 6	Trypsin 1/20, 37°C, 5h, pH 2.2	3083	2223	3279	2861.67	561.716	19.629
Test 9	Trypsin/Lys-C 1/20, 37°C, with urea	1678608	1597717	1623954	1.63343e+06	41269	2.52653
Test 10	Trypsin 1/20, 37°C, 5h, with reduction/alkylation	273651	215286	107339	198759	84378.8	42.4529
VEATFGVDESNAK		VEATFGVDESNAK (y8)	VEATFGVDESNAK (y8)	VEATFGVDESNAK (y8)	VEATFGVDESNAK	VEATFGVDESNAK	VEATFGVDESNAK
Test 1	Trypsin 1/20, 37°C, 5h	643572	566308	498191	569357	72738.4	12.7755
Test 2	Trypsin 1/100, 37°C, 5h	151048	132198	103442	128896	23974.2	18.5996
Test 3	Trypsin 1/1000, 37°C, 5h	11471	11921	5759	9717	3435.11	35.3515
Test 4	Trypsin 1/20, 30°C, 5h	264443	252595	266408	261149	7472.56	2.86142
Test 5	Trypsin 1/20, 23°C, 5h	189086	286324	255849	243753	49734.7	20.4037
Test 6	Trypsin 1/20, 37°C, 5h, pH 2.2	3653	2048	2622	2774.33	813.271	29.3141
Test 9	Trypsin/Lys-C 1/20, 37°C, with urea	1621079	1600799	1670715	1.63086e+06	35970.5	2.20561
Test 10	Trypsin 1/20, 37°C, 5h, with reduction/alkylation	490173	486809	691164	556049	117025	21.0459
YILAGVENSK		YILAGVENSK (y8)	YILAGVENSK (y8)	YILAGVENSK (y8)	YILAGVENSK	YILAGVENSK	YILAGVENSK
Test 1	Trypsin 1/20, 37°C, 5h	637632	477873	476427	530644	92657.1	17.4613
Test 2	Trypsin 1/100, 37°C, 5h	172241	89093	77682	113005	51615.9	45.6756
Test 3	Trypsin 1/1000, 37°C, 5h	21231	19169	10833	17077.7	5505.44	32.2377
Test 4	Trypsin 1/20, 30°C, 5h	128361	121207	127521	125696	3910.5	3.11107
Test 5	Trypsin 1/20, 23°C, 5h	61960	76737	71453	70050	7487.74	10.6891
Test 6	Trypsin 1/20, 37°C, 5h, pH 2.2	32664	19789	36940	29797.7	8927.55	29.9606
Test 9	Trypsin/Lys-C 1/20, 37°C, with urea	3609550	3589204	3428436	3.5424e+06	99215.8	2.80081
Test 10	Trypsin 1/20, 37°C, 5h, with reduction/alkylation	1387432	1084815	1670596	1.38095e+06	292944	21.2133
GTFIIDPGGVIR		GTFIIDPGGVIR (y6)	GTFIIDPGGVIR (y6)	GTFIIDPGGVIR (y6)	GTFIIDPGGVIR	GTFIIDPGGVIR	GTFIIDPGGVIR
Test 1	Trypsin 1/20, 37°C, 5h	2415518	1732511	1722065	1956698	397384	20.3089
Test 2	Trypsin 1/100, 37°C, 5h	257685	155418	132776	181960	66550.1	36.5741
Test 3	Trypsin 1/1000, 37°C, 5h	63337	69626	32784	55249	19707.7	35.6708
Test 4	Trypsin 1/20, 30°C, 5h	413089	530571	560375	501345	77871.1	15.5324
Test 5	Trypsin 1/20, 23°C, 5h	318456	560788	477195	452146	123093	27.2241
Test 6	Trypsin 1/20, 37°C, 5h, pH 2.2	37433	30085	42485	36667.7	6235.33	17.005
Test 9	Trypsin/Lys-C 1/20, 37°C, with urea	11283738	11661037	12385478	11776751	559911	4.75437
Test 14	Trypsin 1/20, 37°C, 5h, with reduction/alkylation	5941707	6471251	5672498	6.02849e+06	406386	6.74109
GAGSSEPVTGLDAK		GAGSSEPVTGLDAK (y8)	GAGSSEPVTGLDAK (y8)	GAGSSEPVTGLDAK (y8)	GAGSSEPVTGLDAK	GAGSSEPVTGLDAK	GAGSSEPVTGLDAK
Test 1	Trypsin 1/20, 37°C, 5h	1082646	714509	660546	819234	229712	28.0398
Test 2	Trypsin 1/100, 37°C, 5h	92856	15699	18622	42392.3	43727.2	103.149
Test 3	Trypsin 1/1000, 37°C, 5h	46524	40739	23704	36989	11863.2	32.0722
Test 4	Trypsin 1/20, 30°C, 5h	156122	129265	128117	137835	15847.7	11.4976
Test 5	Trypsin 1/20, 23°C, 5h	104711	157067	140238	134005	26728.7	19.946
Test 6	Trypsin 1/20, 37°C, 5h, pH 2.2	38025	25603	42911	35513	8923.25	25.1267
Test 9	Trypsin/Lys-C 1/20, 37°C, with urea	4132228	4072611	4383264	4.19603e+06	164863	3.92902
Test 10	Trypsin 1/20, 37°C, 5h, with reduction/alkylation	3182957	3456235	3667464	3435552	242915	7.07062
TPVISGGPYEYR		TPVISGGPYEYR (y8)	TPVISGGPYEYR (y8)	TPVISGGPYEYR (y8)	TPVISGGPYEYR	TPVISGGPYEYR	TPVISGGPYEYR
Test 1	Trypsin 1/20, 37°C, 5h	ND	ND	ND
Test 2	Trypsin 1/100, 37°C, 5h	48256	6237	6257	20250	24253.9	119.772
Test 3	Trypsin 1/1000, 37°C, 5h	26014	29458	13132	22868	8605.67	37.6319
Test 4	Trypsin 1/20, 30°C, 5h	664	249	438	450.333	207.775	46.138
Test 5	Trypsin 1/20, 23°C, 5h	217	415	277	303	101.528	33.5077
Test 6	Trypsin 1/20, 37°C, 5h, pH 2.2	3298	2944	3788	3343.33	423.822	12.6766
Test 9	Trypsin/Lys-C 1/20, 37°C, with urea	1623102	1688528	1694478	1.6687e+06	39603.2	2.37329
Test 10	Trypsin 1/20, 37°C, 5h, with reduction/alkylation	871570	956224	976988	934927	55842.6	5.97294
TPVITGAPYEYR		TPVITGAPYEYR (y8)	TPVITGAPYEYR (y8)	TPVITGAPYEYR (y8)	TPVITGAPYEYR	TPVITGAPYEYR	TPVITGAPYEYR
Test 1	Trypsin 1/20, 37°C, 5h	12613	8136	7854	9534.33	2669.93	28.0033
Test 2	Trypsin 1/100, 37°C, 5h	41463	6209	7146	18272.7	20088.9	109.94
Test 3	Trypsin 1/1000, 37°C, 5h	35262	36625	19255	30380.7	9659.18	31.7938
Test 4	Trypsin 1/20, 30°C, 5h	1832	2134	1002	1656	586.164	35.3964
Test 5	Trypsin 1/20, 23°C, 5h	2272	1366	1109	1582.33	610.936	38.6098
Test 6	Trypsin 1/20, 37°C, 5h, pH 2.2	2599	1610	2448	2219	532.786	24.0102
Test 9	Trypsin/Lys-C 1/20, 37°C, with urea	1514971	1559278	1665142	1579797	77159.6	4.88415
Test 10	Trypsin 1/20, 37°C, 5h, with reduction/alkylation	1340419	1188540	1630388	1386449	224492	16.1918
LGGNEQVTR		LGGNEQVTR (y8)	LGGNEQVTR (y8)	LGGNEQVTR (y8)	LGGNEQVTR	LGGNEQVTR	LGGNEQVTR
Test 1	Trypsin 1/20, 37°C, 5h	6821	4152	3491	4821.33	1763.02	36.567
Test 2	Trypsin 1/100, 37°C, 5h	23279	5934	5760	11657.7	10064.7	86.3359
Test 3	Trypsin 1/1000, 37°C, 5h	18685	18200	10829	15904.7	4402.34	27.6796
Test 4	Trypsin 1/20, 30°C, 5h	956	1596	981	1177.67	362.503	30.7814
Test 5	Trypsin 1/20, 23°C, 5h	1254	540	353	715.667	475.494	66.4407
Test 6	Trypsin 1/20, 37°C, 5h, pH 2.2	18530	12214	22352	17698.7	5119.87	28.928
Test 9	Trypsin/Lys-C 1/20, 37°C, with urea	803873	819176	686119	769723	72806.1	9.45874
Test 10	Trypsin 1/20, 37°C, 5h, with reduction/alkylation	90715	71881	56414	73003.3	17178	23.5305
DGLDAASYYAPVR		DGLDAASYYAPVR (y7)	DGLDAASYYAPVR (y7)	DGLDAASYYAPVR (y7)	DGLDAASYYAPVR	DGLDAASYYAPVR	DGLDAASYYAPVR
Test 1	Trypsin 1/20, 37°C, 5h	78983	53132	53933	62016	14699.3	23.7024
Test 2	Trypsin 1/100, 37°C, 5h	262208	247101	215078	241462	24065.6	9.96662
Test 3	Trypsin 1/1000, 37°C, 5h	38086	31184	19058	29442.7	9632.78	32.7171
Test 4	Trypsin 1/20, 30°C, 5h	ND	ND	ND	ND
Test 5	Trypsin 1/20, 23°C, 5h	ND	ND	ND	ND
Test 6	Trypsin 1/20, 37°C, 5h, pH 2.2	ND	ND	ND	ND
Test 9	Trypsin/Lys-C 1/20, 37°C, with urea	1378504	1506713	1588717	1.49131e+06	105949	7.10445
Test 10	Trypsin 1/20, 37°C, 5h, with reduction/alkylation	902187	942623	1168214	1.00434e+06	143351	14.2731
TACKDGLDAASYYAPVR		TACKDGLDAASYYAPVR (y5)	TACKDGLDAASYYAPVR (y5)	TACKDGLDAASYYAPVR (y5)	TACKDGLDAASYYAPVR	TACKDGLDAASYYAPVR	TACKDGLDAASYYAPVR
Test 1	Trypsin 1/20, 37°C, 5h	ND	ND	ND	ND
Test 2	Trypsin 1/100, 37°C, 5h	ND	8221	9556	8888.5
Test 3	Trypsin 1/1000, 37°C, 5h	ND	ND	ND	ND
Test 4	Trypsin 1/20, 30°C, 5h	ND	ND	ND	ND
Test 5	Trypsin 1/20, 23°C, 5h	ND	ND	ND	ND
Test 6	Trypsin 1/20, 37°C, 5h, pH 2.2	ND	ND	ND	ND
Test 9	Trypsin/Lys-C 1/20, 37°C, with urea	Contamination	Contamination	Contamination
Test 10	Trypsin 1/20, 37°C, 5h, with reduction/alkylation	ND (alkylated)	ND (alkylated)	ND (alkylated)
GTFIIDPAAVIR		GTFIIDPAAVIR (y6)	GTFIIDPAAVIR (y6)	GTFIIDPAAVIR (y6)	GTFIIDPAAVIR	GTFIIDPAAVIR	GTFIIDPAAVIR
Test 1	Trypsin 1/20, 37°C, 5h	636719	420257	432667	496548	121550	24.4791
Test 2	Trypsin 1/100, 37°C, 5h	203977	149997	117286	157087	43778.2	27.8688
Test 3	Trypsin 1/1000, 37°C, 5h	54565	56386	29107	46686	15251.1	32.6673
Test 4	Trypsin 1/20, 30°C, 5h	31781	45362	48611	41918	8927.94	21.2986
Test 5	Trypsin 1/20, 23°C, 5h	19473	39833	29757	29687.7	10180.2	34.2909
Test 6	Trypsin 1/20, 37°C, 5h, pH 2.2	2914	3672	2810	3132	470.536	15.0235
Test 9	Trypsin/Lys-C 1/20, 37°C, with urea	5908223	6441384	6606619	6318742	364993	5.77636
Test 10	Trypsin 1/20, 37°C, 5h, with reduction/alkylation	4987203	6015281	6638382	5.88029e+06	833826	14.18
NLVQPIVVGTGTK		NLVQPIVVGTGTK (y9)	NLVQPIVVGTGTK (y9)	NLVQPIVVGTGTK (y9)	NLVQPIVVGTGTK	NLVQPIVVGTGTK	NLVQPIVVGTGTK
Test 1	Trypsin 1/20, 37°C, 5h	3284085	2869291	2780695	2.97802e+06	268733	9.02387
Test 2	Trypsin 1/100, 37°C, 5h	182974	118043	111222	137413	39604.1	28.8212
Test 3	Trypsin 1/1000, 37°C, 5h	6314	6689	4040	5681	1433.46	25.2326
Test 4	Trypsin 1/20, 30°C, 5h	1372683	1443810	1535847	1450780	81805	5.63869
Test 5	Trypsin 1/20, 23°C, 5h	580686	811186	749670	713847	119352	16.7196
Test 6	Trypsin 1/20, 37°C, 5h, pH 2.2	ND	ND	ND
Test 9	Trypsin/Lys-C 1/20, 37°C, with urea	4097061	4326579	4300701	4241447	125710	2.96384
Test 10	Trypsin 1/20, 37°C, 5h, with reduction/alkylation	1995406	1779187	2543046	2.10588e+06	393730	18.6967

## Sheet: DIGESTIF proteolysis in urine
Digestion conditions		Transition 1				Transition 2				Transition 3
Peptide GTFIIDPGGVIR		y8				y7				y6
		Peak area (heavy)	Peak area (light)	Ratio (H/L)	Estimated peptide quantity (pmoles)	Peak area (heavy)	Peak area (light)	Ratio (H/L)	Estimated peptide quantity (pmoles)	Peak area (heavy)	Peak area (light)	Ratio (H/L)	Estimated peptide quantity (pmoles)	Mean	STDEV
Test 1	Trypsin 1/20, 37°C, 5h	7737	6887339	0.00112337	0.0135927	9778	5467657	0.00178833	0.0216388	15149	12551390	0.00120696	0.0146042	0.0166119	0.00438272
Test 10	Trypsin 1/20, 37°C, 5h, Reduction/Alkylation	22472	183210	0.122657	1.48415	15153	144523	0.104848	1.26867	33358	323429	0.103139	1.24798	1.3336	0.130792
Test 14	Trypsin 1/20, 37°C, 5h, Reduction/Alkylation, FASP	ND				ND				ND
Test 15	Trypsin/Lys-C, 37°C, 5h, FASP	7737	6887339	0.00112337	0.0135927	9778	5467657	0.00178833	0.0216388	15149	12551388	0.00120696	0.0146042	0.0166119	0.00438272
Test 16	Trypsin/Lys-C, 37°C, 5h, Reduction/Alkylation FASP	532060	5079408	0.104748	1.26746	407101	3969388	0.10256	1.24098	1007558	9773734	0.103088	1.24737	1.25193	0.0138169
Peptide DGLDAASYYAPVR		y7				y5				y4
		Peak area (heavy)	Peak area (light)	Ratio (H/L)	Estimated peptide quantity (pmoles)	Peak area (heavy)	Peak area (light)	Ratio (H/L)	Estimated peptide quantity (pmoles)	Peak area (heavy)	Peak area (light)	Ratio (H/L)	Estimated peptide quantity (pmoles)	Mean	STDEV
Test 1	Trypsin 1/20, 37°C, 5h	ND				ND				ND
Test 10	Trypsin 1/20, 37°C, 5h, Reduction/Alkylation	27571	736366	0.037442	0.453048	9355	298633	0.0313261	0.379046	8165	189997	0.0429744	0.51999	0.450694	0.0705016
Test 14	Trypsin 1/20, 37°C, 5h, Reduction/Alkylation, FASP	ND				ND				ND
Test 15	Trypsin/Lys-C, 37°C, 5h, FASP	ND				ND				ND
Test 16	Trypsin/Lys-C, 37°C, 5h, Reduction/Alkylation FASP	171252	4116392	0.0416025	0.50339	73751	1616801	0.0456154	0.551946	49777	1158420	0.0429697	0.519934	0.52509	0.0246855
Peptide NLVQPIVVGTGTK		y9				y6				y11
		Peak area (heavy)	Peak area (light)	Ratio (H/L)	Estimated peptide quantity (pmoles)	Peak area (heavy)	Peak area (light)	Ratio (H/L)	Estimated peptide quantity (pmoles)	Peak area (heavy)	Peak area (light)	Ratio (H/L)	Estimated peptide quantity (pmoles)	Mean	STDEV
Test 1	Trypsin 1/20, 37°C, 5h	ND				ND				ND
Test 10	Trypsin 1/20, 37°C, 5h, Reduction/Alkylation	209095	4207207	0.0496992	0.601361	18711	327257	0.0571752	0.69182	7867	153606	0.0512154	0.619707	0.637629	0.0478189
Test 14	Trypsin 1/20, 37°C, 5h, Reduction/Alkylation, FASP	ND				ND				ND
Test 15	Trypsin/Lys-C, 37°C, 5h, FASP	ND				ND				ND
Test 16	Trypsin/Lys-C, 37°C, 5h, Reduction/Alkylation FASP	73893	2443549	0.03024	0.365904	5789	196930	0.0293962	0.355694	ND				0.360799

## Sheet: DIGESTIF proteolysis liver lysa
Digestion conditions		Transition 1				Transition 2				Transition 3
Peptide GTFIIDPGGVIR		y8				y7				y6
		Peak area (heavy)	Peak area (light)	Ratio (H/L)	Estimated peptide quantity (pmoles)	Peak area (heavy)	Peak area (light)	Ratio (H/L)	Estimated peptide quantity (pmoles)	Peak area (heavy)	Peak area (light)	Ratio (H/L)	Estimated peptide quantity (pmoles)	Mean	STDEV
Test 1	Trypsin 1/20, 37°C, 5h	ND				3604	5879012	0.000613028	0.00741764	11909	13734930	0.000867059	0.0104914	0.00895453	0.00217349
Test 9	Trypsin/Lys-C 1/20, 37°C, 1h30 in 4M urea + 3h30 in 1M urea	778708	4975399	0.156512	1.89379	1196130	7318631	0.163436	1.97758	3097187	17303416	0.178993	2.16581	2.01239	0.139313
Test 10	Trypsin 1/20, 37°C, 5h after reduction/alkylation	25968	6442413	0.00403079	0.0487725	33938	8986084	0.00377673	0.0456984	69956	22575160	0.0030988	0.0374955	0.0439888	0.00582964
Peptide DGLDAASYYAPVR		y7				y5				y4
		Peak area (heavy)	Peak area (light)	Ratio (H/L)	Estimated peptide quantity (pmoles)	Peak area (heavy)	Peak area (light)	Ratio (H/L)	Estimated peptide quantity (pmoles)	Peak area (heavy)	Peak area (light)	Ratio (H/L)	Estimated peptide quantity (pmoles)	Mean	STDEV
Test 1	Trypsin 1/20, 37°C, 5h	5279	2287423	0.00230784	0.0279248	8530	2514784	0.00339194	0.0410425	10724	1799094	0.00596078	0.0721254	0.0470309	0.0227006
Test 9	Trypsin/Lys-C 1/20, 37°C, 1h30 in 4M urea + 3h30 in 1M urea	229677	2993520	0.0767247	0.928369	92110	3086193	0.0298458	0.361135	106986	2153285	0.049685	0.601189	0.630231	0.28473
Test 10	Trypsin 1/20, 37°C, 5h after reduction/alkylation	293166	4423236	0.0662786	0.801971	74718	4435083	0.016847	0.203849	49703	3084043	0.0161162	0.195006	0.400275	0.347907
Peptide NLVQPIVVGTGTK		y9				y11				y10
		Peak area (heavy)	Peak area (light)	Ratio (H/L)	Estimated peptide quantity (pmoles)	Peak area (heavy)	Peak area (light)	Ratio (H/L)	Estimated peptide quantity (pmoles)	Peak area (heavy)	Peak area (light)	Ratio (H/L)	Estimated peptide quantity (pmoles)	Mean	STDEV
Test 1	Trypsin 1/20, 37°C, 5h	199584	5803043	0.034393	0.416155	26224	849836	0.0308577	0.373378	62789	1754284	0.0357918	0.433081	0.407538	0.0307699
Test 9	Trypsin/Lys-C 1/20, 37°C, 1h30 in 4M urea + 3h30 in 1M urea	320634	2462264	0.130219	1.57565	40082	345029	0.11617	1.40566	70265	704483	0.0997398	1.20685	1.39605	0.184588
Test 10	Trypsin 1/20, 37°C, 5h after reduction/alkylation	629261	5809501	0.108316	1.31062	83761	905833	0.0924685	1.11887	168297	1827018	0.0921157	1.1146	1.18136	0.111961
